# Supplementary material
Source: HighWire-hosted journal article supplement (https://bmjopenquality.bmj.com/highwire/filestream/136058/field_highwire_adjunct_files/1/ds1710.docx)
Supplement: ds1710.docx [file ds1710.docx]

Figure 4: T4 Attendance May 2012 – March 2013 Figure 5: T4 Attendance by Specialty Cluster
